# Supplementary material for: A scalable ternary SnO2–Co–C composite as a high initial coulombic efficiency, large capacity and long lifetime anode for lithium ion batteries
Source: Royal Society of Chemistry journal article supplement (doi:10.1039/c8ta00957k), 2018-01-01
Supplement: c8ta00957k1.pdf [file c8ta00957k1.pdf]

## **Supporting Information for**

### **A Scalable Ternary SnO<sub>2</sub>-Co-C Composite as a High Initial Coulombic Efficiency, Large Capacity and Long Lifetime Anode for Lithium Ion Batteries**

*Tao Liang<sup>a</sup>, Renzong Hu<sup>\*a</sup>, Houpo Zhang<sup>a</sup>, Hanyin Zhang<sup>a</sup>, Hui Wang<sup>a</sup>, Yunpeng Ouyang<sup>b</sup>, Jun Liu<sup>a</sup>, Lichun Yang<sup>a</sup>, and Min Zhu<sup>a</sup>*

<sup>a</sup> Guangdong Provincial Key Laboratory of Advanced Energy Storage Materials, School of Materials Science and Engineering, South China University of Technology, Guangzhou, 510640, China

\*E-mail: [msrenzonghu@scut.edu.cn](mailto:msrenzonghu@scut.edu.cn)

<sup>b</sup> Cell Technology Research Center, Sunwoda Electronic Co., Ltd, Shenzhen 518107, China

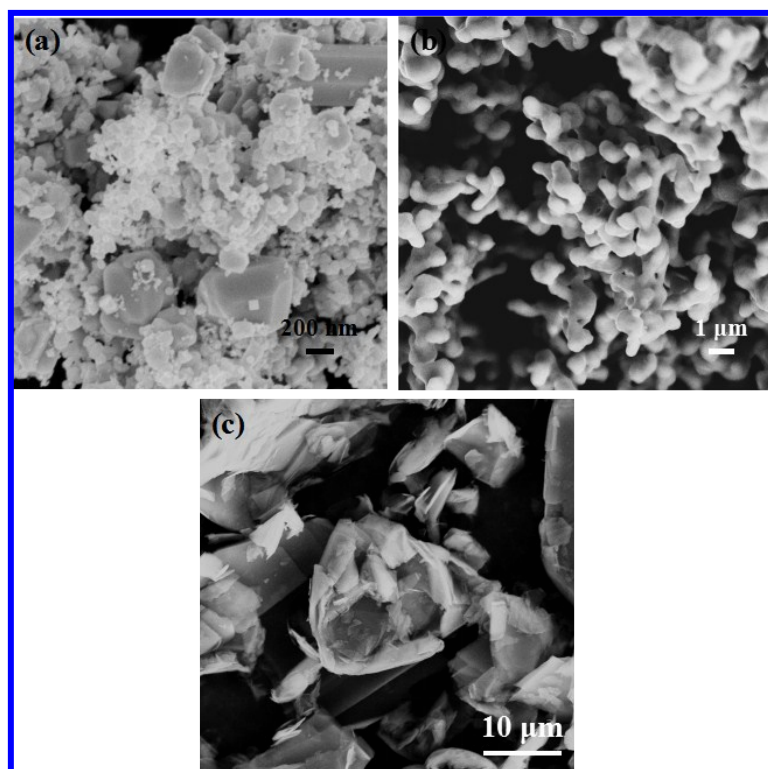

Figure S1 SEM images of pristine (a) SnO<sub>2</sub>, (b) Co and (c) graphite, respectively.

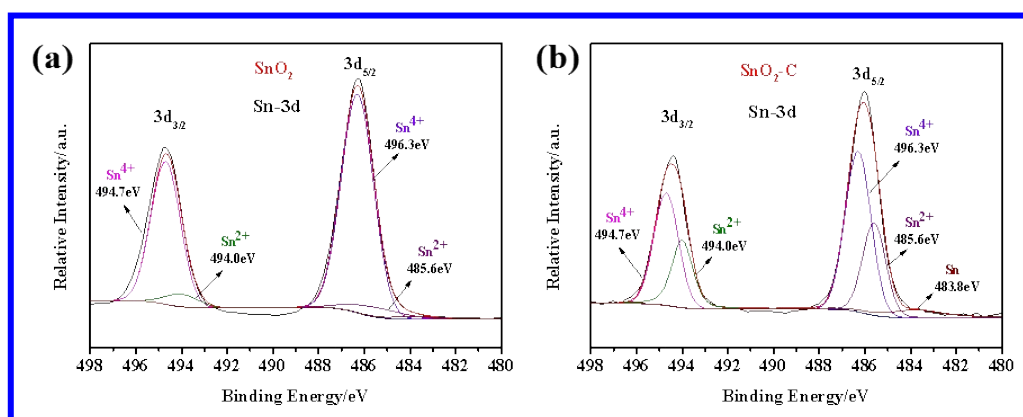

Figure S2 Sn-3d XPS spectra of the milled (a) SnO<sub>2</sub> and (b) SnO<sub>2</sub>-C samples.

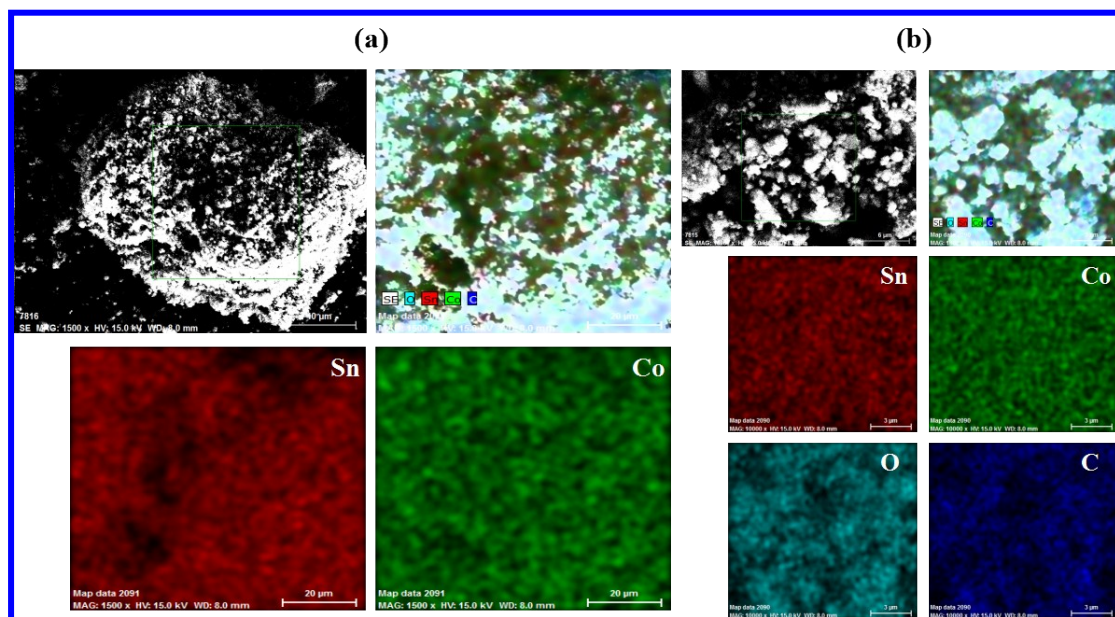

Figure S3 SEM-EDS mapping of the Sn, Co, C and O elements in (a) micro-scale and (b) nano-scale areas of SnO<sub>2</sub>-Co-C composite.

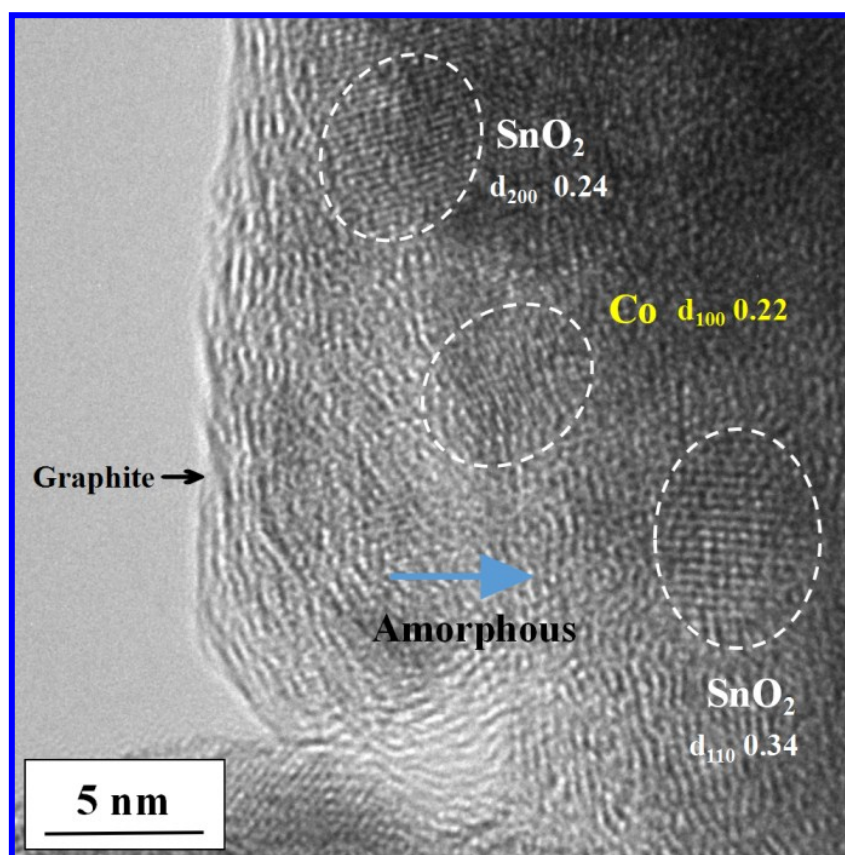

Figure S4 High-resolution image showing the nanosized SnO<sub>2</sub>, Mn, amorphous zones and thin graphite nanosheets.

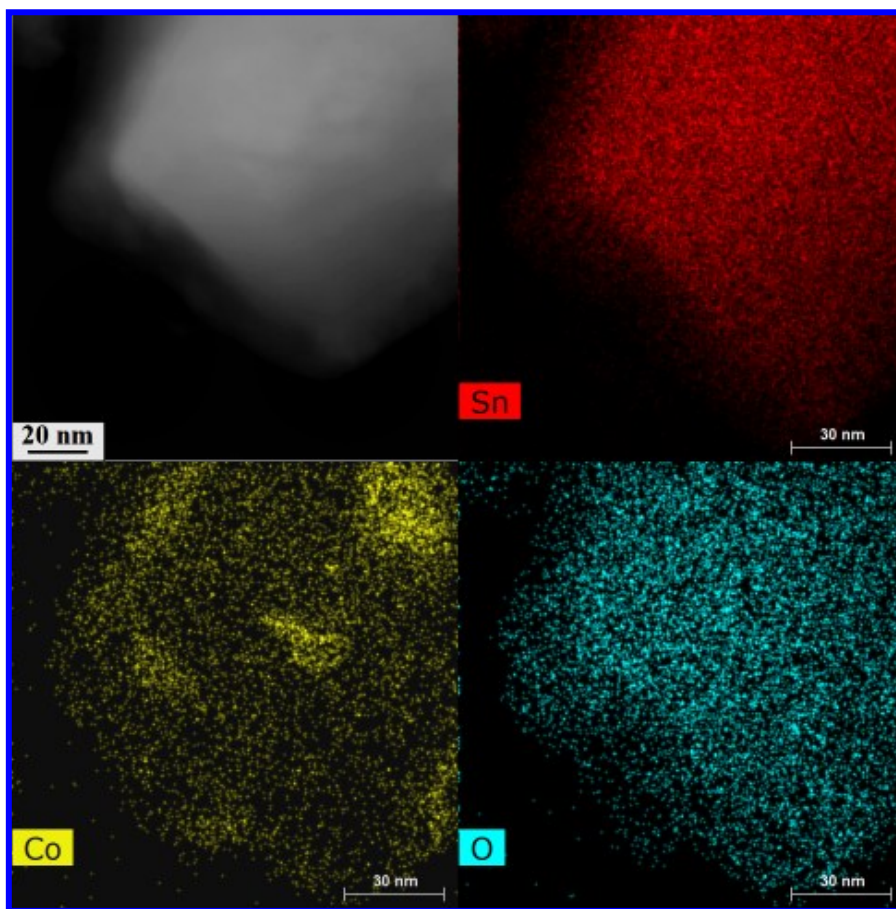

Figure S5 HAADF-STEM image with corresponding elemental mappings of Sn, Co and O in a smaller grain of the SnO<sub>2</sub>-Co-C composite.

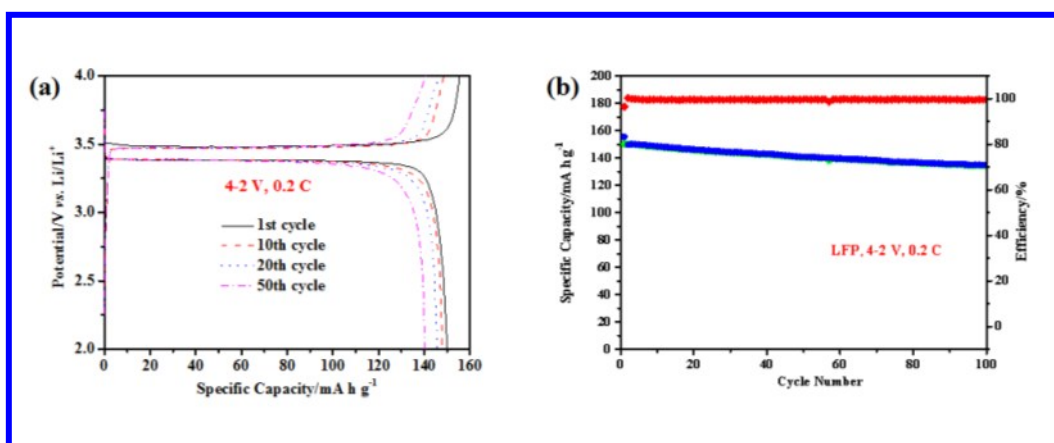

Figure S6 (a) The charge/discharge curves of selective cycles and (b) Cycling performance of commercial LiFePO<sub>4</sub> cathode at a current rate of 0.2 C among the potential range of 2-4 V.

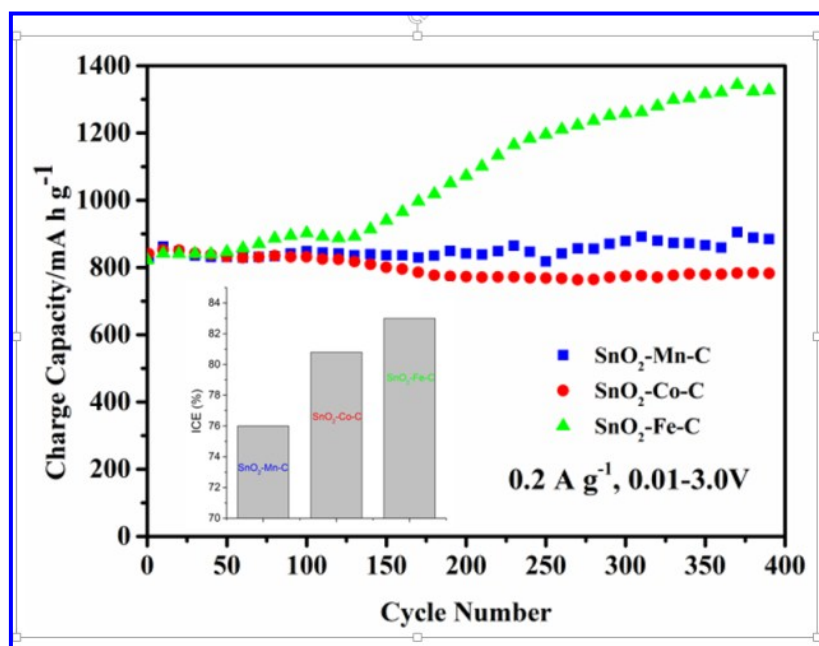

**Figure S7 Comparison of the reversible capacity, capacity retention, and ICE of the SnO<sub>2</sub>-Mn-C, SnO<sub>2</sub>-Fe-C and SnO<sub>2</sub>-Co-C composites at a current rate of 0.2 A g<sup>-1</sup> among potential range of 0.01-3.0 V**

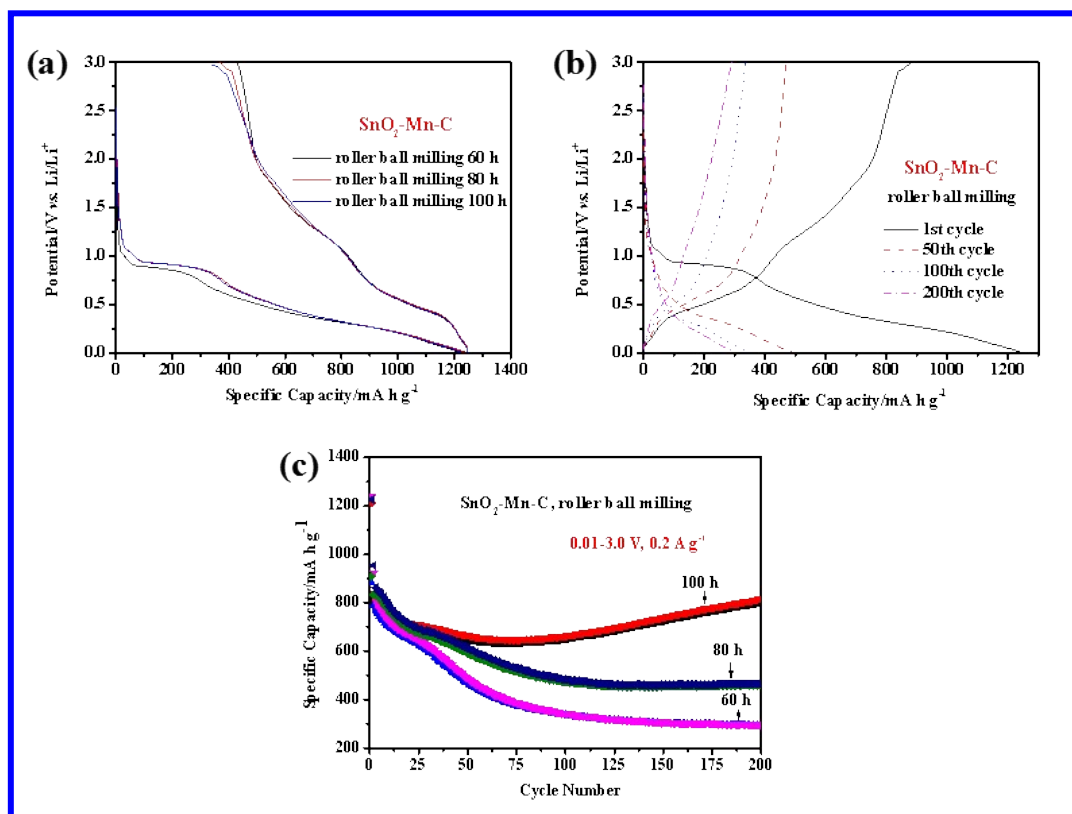

Figure S8 (a) The initial galvanostatic discharge/charge curves of  $\text{SnO}_2\text{-Mn-C}$  prepared by roller ball milling for different time. (b) The selective discharge/charge curves of milled-80 h  $\text{SnO}_2\text{-Mn-C}$  samples at a current rate of  $0.2 \text{ A g}^{-1}$  among the potential range of 0.01-3.0 V. (c) The cycling performance of the milled  $\text{SnO}_2\text{-Mn-C}$  samples.



**Table S1 Comparison of the electrochemical performances of the SnO<sub>2</sub>-Co-C ternary anode with other metal oxide nanostructure anodes**

|                        | <b>Materials</b>                                         | <b>Synthetic method</b> | <b>Potential range</b> | <b>ICE</b> | <b>1<sup>st</sup> charge capacity</b> | <b>Capacity retention</b>                                                   |
|------------------------|----------------------------------------------------------|-------------------------|------------------------|------------|---------------------------------------|-----------------------------------------------------------------------------|
| Our work               | SnO <sub>2</sub> -Co-C                                   | ball milling            | 0.01-3.0 V             | 80.8 %     | 894 mA h g <sup>-1</sup>              | 780 mA h g <sup>-1</sup> after 400 cycles at 0.2 A g <sup>-1</sup> (87.2%)  |
| Ref.S 1 <sup>1</sup>   | SnO <sub>x</sub> @C                                      | spray pyrolysis         | 0.001-3.0 V            | 65.0 %     | 1083 mA h g <sup>-1</sup>             | 870 mA h g <sup>-1</sup> after 100 cycles at 2 A g <sup>-1</sup> (80.3%)    |
| Ref.S 2 <sup>2</sup>   | SnO <sub>2</sub> @Co <sub>3</sub> O <sub>4</sub> spheres | hydrothermal method     | 0.05-3.0 V             | 65.6 %     | 1167 mA h g <sup>-1</sup>             | 815 mA h g <sup>-1</sup> after 100 cycles at 0.2 A g <sup>-1</sup> (69.8%)  |
| Ref.S 3 <sup>3</sup>   | Co-SnO <sub>2</sub> spheres                              | solvothermal method     | 0.01-2.0 V             | 67.6 %     | 1322 mA h g <sup>-1</sup>             | 810 mA h g <sup>-1</sup> after 50 cycles at 0.78 A g <sup>-1</sup> (61.3%)  |
| Ref.S 4 <sup>4</sup>   | C-SnO <sub>2</sub> -rGO                                  | vacuum annealing        | 0.005-3.0 V            | 65.9 %     | 657 mA h g <sup>-1</sup>              | 633 mA h g <sup>-1</sup> after 100 cycles at 0.2 A g <sup>-1</sup> (96.3%)  |
| Ref.S 5 <sup>5</sup>   | G/SnO <sub>2</sub> -Co <sub>3</sub> O <sub>4</sub>       | hydrothermal method     | 0.01-3.0 V             | 66.5 %     | 2173 mA h g <sup>-1</sup>             | 1208 mA h g <sup>-1</sup> after 100 cycles at 1 A g <sup>-1</sup> (47.3%)   |
| Ref.S 6 <sup>6</sup>   | GNRs/SnO <sub>2</sub>                                    | solvothermal method     | 0.01-2.5 V             | 74.3 %     | 1130 mA h g <sup>-1</sup>             | 825 mA h g <sup>-1</sup> after 50 cycles at 0.1 A g <sup>-1</sup> (73.0%)   |
| Ref.S 7 <sup>7</sup>   | SnO <sub>2</sub> /TiO <sub>2</sub> nanocomposites        | solvothermal method     | 0.01-3.0 V             | 67.1 %     | 1173 mA h g <sup>-1</sup>             | 487 mA h g <sup>-1</sup> after 1000 cycles at 2 A g <sup>-1</sup> (41.5%)   |
| Ref.S 8 <sup>8</sup>   | SnO <sub>2</sub> -SiC/G                                  | ball milling            | 0.01-3.0 V             | 66.0 %     | 1450 mA h g <sup>-1</sup>             | 670 mA h g <sup>-1</sup> after 650 cycles at 0.1 A g <sup>-1</sup> (46.2%)  |
| Ref.S 9 <sup>9</sup>   | SnO <sub>2</sub> /C composites                           | solvothermal method     | 0.01-1.5 V             | 44.8 %     | 916 mA h g <sup>-1</sup>              | 511 mA h g <sup>-1</sup> after 1000 cycles at 1.4 A g <sup>-1</sup> (55.8%) |
| Ref.S 10 <sup>10</sup> | SnO <sub>2</sub> /Graphene nanosheets                    | atomic layer deposition | 0.01-3.0 V             | 61.8 %     | 1042 mA h g <sup>-1</sup>             | 793 mA h g <sup>-1</sup> after 150 cycles at 0.4 A g <sup>-1</sup> (76.1%)  |
| Ref.S 11 <sup>11</sup> | SnO <sub>2</sub> @TiO <sub>2</sub>                       | atomic layer            | 0.005-1.5 V            | 67.7 %     | 962 mA h g <sup>-1</sup>              | 393 mA h g <sup>-1</sup> after 1000 cycles at 0.4 A                         |

|                        |                                                       |                              |             |        |                           |                                                                             |
|------------------------|-------------------------------------------------------|------------------------------|-------------|--------|---------------------------|-----------------------------------------------------------------------------|
|                        | core-shell nanowires                                  | deposition                   |             |        |                           | $\text{g}^{-1}$ (40.9%)                                                     |
| Ref.S 12 <sup>12</sup> | N-doped $\text{SnO}_2$ nanoparticles                  | laser-assisted pyrolysis     | 0.01-3.0 V  | 69.0 % | 1182 mA h $\text{g}^{-1}$ | 750 mA h $\text{g}^{-1}$ after 500 cycles at 1.4 A $\text{g}^{-1}$ (63.5%)  |
| Ref.S 13 <sup>13</sup> | $\text{SnO}_2$ in N-doped Graphene sheets             | vapor reduction method       | 0.005-3.0 V | 61.3 % | 1144 mA h $\text{g}^{-1}$ | 1346 mA h $\text{g}^{-1}$ after 500 cycles at 0.5 A $\text{g}^{-1}$ (85.0%) |
| Ref.S 14 <sup>14</sup> | $\text{Co}_3\text{O}_4/\text{C}$                      | electrodeposition            | 0.01-3.0 V  | 57.3 % | 692 mA h $\text{g}^{-1}$  | 797 mA h $\text{g}^{-1}$ after 150 cycles at 0.89 A $\text{g}^{-1}$ (86.8%) |
| Ref.S 15 <sup>15</sup> | ZnO nanoparticles                                     | plasma treatment             | 0.001-3.0 V | 70.2 % | 961 mA h $\text{g}^{-1}$  | 760 mA h $\text{g}^{-1}$ after 100 cycles at 0.2 A $\text{g}^{-1}$ (79.1%)  |
| Ref.S 16 <sup>16</sup> | Amorphous $\text{MnO}_x/\text{C}$                     | aerosol spray pyrolysis      | 0.01-3.0 V  | 60.0 % | 650 mA h $\text{g}^{-1}$  | 601 mA h $\text{g}^{-1}$ after 130 cycles at 0.2 A $\text{g}^{-1}$ (92.5%)  |
| Ref.S 17 <sup>17</sup> | $\text{MnO}@$ Carbon composites                       | annealing treatment          | 0.01-3.0 V  | 59.1 % | 738 mA h $\text{g}^{-1}$  | 660 mA h $\text{g}^{-1}$ after 1000 cycles at 0.5 A $\text{g}^{-1}$ (89.4%) |
| Ref.S 18 <sup>18</sup> | $\text{MnO}/\text{N}-\text{C}$ hybrid                 | thermal calcination          | 0.01-3.0 V  | 73.7 % | 884 mA h $\text{g}^{-1}$  | 667 mA h $\text{g}^{-1}$ after 500 cycles at 0.5 A $\text{g}^{-1}$ (75.5%)  |
| Ref.S 19 <sup>19</sup> | Carbon coated $\text{TiO}_2@$ $\text{Fe}_2\text{O}_3$ | template-assisted hydrolysis | 0.01-3.0 V  | 76.2 % | 640 mA h $\text{g}^{-1}$  | 516 mA h $\text{g}^{-1}$ after 200 cycles at 0.2 A $\text{g}^{-1}$ (80.6%)  |
| Ref.S 20 <sup>20</sup> | $\text{Fe}_2\text{O}_3$ nanofibers                    | thermal treatment            | 0.005-3.0 V | 34.0 % | 420 mA h $\text{g}^{-1}$  | 680 mA h $\text{g}^{-1}$ after 50 cycles at 65 mA $\text{g}^{-1}$ (61.8%)   |



## References:

1. Y. J. Hong and Y. C. Kang, *Carbon*, 2015, **88**, 262-269.
2. B. Zhao, S.-Y. Huang, T. Wang, K. Zhang, M. M. F. Yuen, J.-B. Xu, X.-Z. Fu, R. Sun and C.-P. Wong, *J. Power Sources*, 2015, **298**, 83-91.
3. L. Mei, C. C. Li, B. H. Qu, M. Zhang, C. Xu, D. N. Lei, Y. J. Chen, Z. Xu, L. B. Chen, Q. H. Li and T. H. Wang, *Nanoscale*, 2012, **4**, 5731-5737.
4. X. Huang, J. Chen, H. Yu, R. Cai, S. Peng, Q. Yan and H. H. Hng, *J. Mater. Chem. A*, 2013, **1**, 6901-6907.
5. J. Guo, H. Zhu, Y. Sun, L. Tang and X. Zhang, *J. Mater. Chem. A*, 2016, **4**, 16101-16107.
6. J. Lin, Z. W. Peng, C. S. Xiang, G. D. Ruan, Z. Yan, D. Natelson and J. M. Tour, *ACS Nano*, 2013, **7**, 6001-6006.
7. X. Shi, S. Liu, B. Tang, X. Lin, A. Li, X. Chen, J. Zhou, Z. Ma and H. Song, *Chem. Eng. J.*, 2017, **330**, 453-461.
8. Z. Chen, M. Zhou, Y. Cao, X. Ai, H. Yang and J. Liu, *Adv. Energy Mater.*, 2012, **2**, 95-102.
9. A. Jahel, C. M. Ghimbeu, L. Monconduit and C. Vix-Guterl, *Adv. Energy Mater.*, 2014, **4**, 1400025.
10. X. Li, X. Meng, J. Liu, D. Geng, Y. Zhang, M. N. Banis, Y. Li, J. Yang, R. Li, X. Sun, M. Cai and M. W. Verbrugge, *Adv. Funct. Mater.*, 2012, **22**, 1647-1654.
11. C. Guan, X. Wang, Q. Zhang, Z. Fan, H. Zhang and H. J. Fan, *Nano Lett.*, 2014, **14**, 4852-4858.
12. L. P. Wang, Y. Leconte, Z. Feng, C. Wei, Y. Zhao, Q. Ma, W. Xu, S. Bourrioux, P. Azais, M. Srinivasan and Z. J. Xu, *Adv. Mater.*, 2017, **29**.
13. X. Zhou, L.-J. Wan and Y.-G. Guo, *Adv. Mater.*, 2013, **25**, 2152-2157.
14. G.-P. Kim, S. Park, I. Nam, J. Park and J. Yi, *J. Mater. Chem. A*, 2013, **1**, 3872.
15. Y. Zhang, Y. Lu, S. Feng, D. Liu, Z. Ma and S. Wang, *J. Mater. Chem. A*, 2017, **5**, 22512-22518.
16. J. Guo, Q. Liu, C. Wang and M. R. Zachariah, *Adv. Funct. Mater.*, 2012, **22**, 803-811.
17. X. Li, S. Xiong, J. Li, X. Liang, J. Wang, J. Bai and Y. Qian, *Chem. - Eur. J.*, 2013, **19**, 11310-11319.
18. W. Zhang, J. Sheng, J. Zhang, T. He, L. Hu, R. Wang, L. Mai and S. Mu, *J. Mater. Chem. A*, 2016, **4**, 16936-16945.
19. J. Luo, X. Xia, Y. Luo, C. Guan, J. Liu, X. Qi, C. F. Ng, T. Yu, H. Zhang and H. J. Fan, *Adv. Energy Mater.*, 2013, **3**, 737-743.
20. M. V. Reddy, T. Yu, C. H. Sow, Z. X. Shen, C. T. Lim, G. V. Subba Rao and B. V. R. Chowdari, *Adv. Funct. Mater.*, 2007, **17**, 2792-2799.
